1     **MATERNAL ZIKA VIRUS (ZIKV) INFECTION FOLLOWING VAGINAL INOCULATION**  
2     **WITH ZIKV-INFECTED SEMEN IN THE TIMED-PREGNANT OLIVE BABOON**

3  
4  
5  
6     Sunam Gurung<sup>1,4</sup>, Hugh Nadeau<sup>1,4</sup>, Marta Maxted<sup>1</sup>, Jamie Peregrine<sup>1</sup>, Darlene Reuter<sup>3</sup>,  
7     Abby Norris<sup>3</sup>, Rodney Edwards<sup>1</sup>, Kimberly Hyatt<sup>1</sup>, Krista Singleton<sup>1</sup>, James F. Papin<sup>2,3</sup>,  
8     Dean A. Myers<sup>1</sup>  
9

10  
11     <sup>1</sup>Department of Obstetrics and Gynecology, <sup>2</sup>Department of Pathology, <sup>3</sup>Division of  
12     Comparative Medicine, Oklahoma City, OK 73109, <sup>4</sup>First and second authors  
13     contributed equally to the preparation of this manuscript.

14  
15  
16  
17     **Running Head: VAGINAL INFECTION OF ZIKA VIRUS IN PREGNANT BABOONS**

18  
19  
20     **Corresponding author:**

21     Dean A. Myers, Ph.D.  
22     Section of Maternal Fetal Medicine  
23     Department of Obstetrics and Gynecology  
24     University of Oklahoma Health Sciences Center  
25     Oklahoma City, OK 73104  
26     (405) 271-2286  
27     dean-myers@ouhsc.edu

28  
29     **Funding:** NIH HD096240-01A1; NIH NS103772-01  
30  
31  
32  
33  
34  
35  
36  
37  
38  
39  
40  
41  
42  
43

44 **ABSTRACT**

45

46 ZIKV infection is associated with pregnancy loss, fetal microcephaly and other  
47 malformations. While *Aedes sp.* of mosquito are the primary vector for ZIKV, sexual  
48 transmission of ZIKV is a significant route of infection. ZIKV has been documented in  
49 human, mouse and non-human primate (NHP) semen. It is critical to establish NHP  
50 models of vertical transfer of ZIKV that recapitulate human ZIKV pathogenesis. We  
51 hypothesized that vaginal deposition of ZIKV infected baboon semen would lead to  
52 maternal infection and vertical transfer in the olive baboon (*Papio anubis*). Timed  
53 pregnant baboons (n=6) were inoculated via vaginal deposition of baboon semen  
54 containing  $10^6$  ffu ZIKV (n=3, French Polynesian isolate:H/PF/2013, n=3 Puerto Rican  
55 isolate:PRVABC59) at mid-gestation (86-95 days gestation [dG]; term 183dG) on day (d)  
56 0 (all dams), and then at 7 day intervals through three weeks. Maternal blood, saliva and  
57 cervico-vaginal washes were obtained at select days post-inoculation. Animals were  
58 euthanized at 28 days post initial inoculation (dpi; n=5) or 39 dpi (n=1) and maternal/fetal  
59 tissues collected. vRNA was quantified by qPCR. Viremia was achieved in 3/3 FP ZIKV  
60 infected dams and 2/3 PR ZIKV. ZIKV RNA was detected in cvw (5/6 dams;). ZIKV RNA  
61 was detected in lymph nodes, but not ovary, uterus, cervix or vagina in the FP ZIKV  
62 dams but was detected in uterus, vagina and lymph nodes. Placenta, amniotic fluid and  
63 all fetal tissues were ZIKV RNA negative in the FP infected dams whereas 2/3 PR  
64 infected dam placentas were ZIKV RNA positive. We conclude that ZIKV infected  
65 semen is a means of ZIKV transmission during pregnancy in primates. The PR isolate  
66 appeared more capable of wide spread dissemination to tissues, including placenta  
67 compared to the FP strain.

68

69

70 **IMPORTANCE**

71 Due to its established link to pregnancy loss, microcephaly and other major congenital  
72 anomalies, Zika virus (ZIKV) remains a worldwide health threat. Although mosquitoes  
73 are the primary means of ZIKV transmission, sexual transmission in human populations  
74 is well documented and provides a means for widespread dissemination of the virus.  
75 Differences in viremia, tissue distribution, immune responses and pregnancy outcome  
76 from sexually transmitted ZIKV compared to the subcutaneous route of infection are  
77 needed to better clinically manage ZIKV in pregnancy. Through our previous work, we  
78 have developed the olive baboon as a non-human primate model of ZIKV infection that  
79 is permissible to ZIKV infection via the subcutaneous route of inoculation and transfer of  
80 ZIKV to the fetus in pregnancy. The current study evaluated the course of ZIKV infection  
81 after vaginal inoculation of ZIKV in pregnant baboons at mid-gestation using baboon  
82 semen as the carrier and comparing two isolates of ZIKV, the French Polynesian isolate  
83 first associated with microcephaly and the Puerto Rican isolate, associated with an  
84 increased risk of microcephaly observed in the Americas.

85

86

87

88

89

90

91

## 92 INTRODUCTION

93 The propagation of Zika virus (ZIKV) represents a worldwide reproductive health  
94 crisis given the virus's geographic distribution and severity of its effect on the developing  
95 fetus. At its peak, ZIKV infection was being reported in more than 60 countries (1, 2).  
96 While ZIKV infection is usually mild or asymptomatic with typical symptoms that include  
97 fever, rash, and conjunctivitis, the impact of ZIKV on the developing fetus can be severe,  
98 including microcephaly and associated neurological damage, fetal growth restriction,  
99 intrauterine fetal demise, spontaneous abortion as well as other congenital anomalies  
100 now termed collectively as Congenital Zika Syndrome (CZS). The impact of ZIKV  
101 infection on the fetus led to worldwide interest in the virus following the major outbreak in  
102 Brazil in 2015 (3).

103 While the *Aedes* species of mosquitos are the primary means of ZIKV  
104 transmission, sexual transmission of ZIKV is now well documented in the human  
105 population (4-8) and a greater incidence of ZIKV in females of a sexually active age (9)  
106 suggesting sexual transmission as a causative factor. Sexual transmission in humans  
107 was first reported in 2008 (10) and from 2015-2018, 52 cases of sexually transmitted  
108 ZIKV were reported in the United States (11). Sexual transmission of ZIKV has been  
109 described from a male to pregnant female as well (12, 13). ZIKV RNA and infectious  
110 virus have been detected in human semen, considerably longer than detection in blood,  
111 saliva and urine (6). ZIKV RNA has been detected in semen at 188 days post-onset of  
112 symptoms, while infectious ZIKV has been observed in human semen up to 69 days  
113 post-symptoms (8, 14). We recently demonstrated ZIKV RNA in semen in male baboons  
114 up to 41 days post infection which was when the study was terminated and persistence  
115 of ZIKV RNA in the male reproductive tissues after systemic resolution of the virus thus  
116 confirming findings in human population (15). Male to female sexual transmission of

117 ZIKV has been observed in an interferon deficient (AG129) mouse model of ZIKV  
118 infection, resulting in a high degree of infection of AG129 females, including vertical  
119 transfer. In addition, vaginal ZIKV inoculation resulted in a high degree of infection in  
120 both non-pregnant and pregnant AG129 females. Yockey et al (16) similarly found that  
121 ZIKV replicated in the vaginal mucosa of wild type mice and while not leading to viremia,  
122 did result in fetal growth restriction and infection of the fetal brains indicating that vaginal  
123 inoculation may lead to direct transfer of the virus to the intrauterine compartment  
124 through a compromised cervical canal or via local lymphatics to the utero-placental  
125 interface. Vaginal inoculation of non-pregnant female Rhesus monkeys with ZIKV has  
126 also been achieved, albeit using raw virus in culture media diluent rather than semen in  
127 the inoculant. A recent study suggested that human semen may actually inhibit ZIKV  
128 infectivity in an *in vitro* setting, including human reproductive tract explants (17).  
129 Studies estimate sexual transmission of ZIKV in human population to be responsible for  
130 substantial number of infections and maintenance of virus in human population with or  
131 without the presence of the vector. This is particularly of concern in pregnant women as  
132 studies have shown ZIKV to be disseminated to placenta and fetus after intravaginal  
133 infections and cause CZS in fetus (7, 16, 18-20) . Sexual transmission is also a likely  
134 means for the global spread of the virus between land masses.

135         The present study focused on the time course of the emergence and persistence  
136 of ZIKV in the blood, saliva, cervico-vaginal washings, and in maternal reproductive and  
137 fetal tissues following intravaginal inoculation using ZIKV containing semen in baboons  
138 at mid-gestation. In addition, we compared responses to both French Polynesian and  
139 Puerto Rican ZIKV isolates to assess for differences in virulence, tissue tropism and  
140 vertical transfer. Although the initial link between vertical transfer of ZIKV and  
141 microcephaly was first described in the French Polynesian outbreak after *post-hoc*

142 analysis, a dramatic increase in microcephaly and CZS was observed in Brazil and other  
143 tropical American regions including Puerto Rico. Although an initial examination of  
144 isolates found a single point mutation in the FP isolate to likely contribute to  
145 neuroprogenitor cell targeting by ZIKV and potentially vertical transfer mechanisms,  
146 American isolates have accumulated further mutations and thus may render a more  
147 severe pregnancy outcome. This study targets many gaps in current knowledge about  
148 viremia and pregnancy outcome due to ZIKV infection transmitted sexually in a highly  
149 relevant non-human primate, the Olive Baboon.

150

151

## 152 **MATERIALS AND METHODS**

153

154

155

### 156 **Ethical Statement**

157 All experiments utilizing baboons were performed in compliance with guidelines  
158 established by the Animal Welfare Act for housing and care of laboratory animals as well  
159 as the United States National Institutes of Health Office of Laboratory Animal Welfare  
160 Public Health Service Policy on the Humane Care and Use of Laboratory Animals in  
161 Assessment and Accreditation of Laboratory Animal Care (AAALAC) International and  
162 National accredited laboratories. All experiments were conducted in accordance with  
163 and approval from the University of Oklahoma Health Sciences Center Institutional  
164 Animal Care and Use Committee (IACUC; protocol no. 101523-16-039-I). All studies  
165 with ZIKV infection were performed in Assessment and Accreditation of Laboratory  
166 Animal Care (AAALAC) International accredited ABSL2 containment facilities at the  
167 OUHSC. Baboons were fed standard monkey chow twice daily as well as receiving daily  
168 food supplements (fruits). Appropriate measures were utilized to reduce potential  
169 distress, pain and discomfort. Ketamine (10 mg/kg) was used to sedate baboons during

170 all procedures, which were performed by trained personnel. All animals received  
171 environmental enrichment. ZIKV infected animals were caged separately but within  
172 visual and auditory contact of other baboons to promote social behavior and alleviate  
173 stress. At the designated times post inoculation, the animals were euthanized according  
174 to the recommendations of the American Veterinary Medical Association (2013 panel on  
175 Euthanasia).

176

### 177 **Animals**

178 Adult timed-pregnant female olive baboons (n=6) were utilized for this study. All  
179 females were multiparous with history of successful prior pregnancies. All dams used in  
180 this study were determined to be seronegative for West Nile Virus (21).

181

### 182 **Virus stocks, infection and sample collection**

183 Animals were anesthetized with an intramuscular dose of Ketamine (10 mg/kg) before all  
184 procedures (viral inoculation, blood, salivary swabs and cervico-vaginal washing  
185 collection). Timed-pregnant female baboons were infected vaginally with a dose of  $10^6$   
186 focus forming units (ffu; 1 ml volume per dose) of the baboon semen-spiked with the  
187 French Polynesian ZIKV isolate (H/PF/2013) or the Puerto Rican ZIKV isolate  
188 (PRVABC59) placed at the cervical os using a speculum to aid with deposition. Semen  
189 samples were collected by rectal probe ejaculation as previously described for our  
190 laboratory (15) from total of 11 male baboons seronegative for WNV and ZIKV and  
191 stored immediately at  $-80^{\circ}\text{C}$ . Each semen aliquot was thawed on ice before adding virus  
192 to it for vaginal infection. Semen samples were chosen at random per inoculation.  
193 Inoculations were repeated every 7 days until ZIKV RNA was detected in whole blood by

194 qPCR, or in one dam that never became viremic, through 4 weekly inoculations. The  
195 dosage used to infect the animals in our study is based on the previous works done in  
196 mosquitoes carrying WNV and DENV, where it was estimated that mosquitoes carry  
197  $1 \times 10^4$  to  $1 \times 10^6$  plaque forming units (PFU) of the virus (22), from a study evaluating  
198 Brazilian ZIKV in a bite from *Aedes aegypti* mosquito and from a study of mosquito  
199 transmission of ZIKV in rhesus monkeys (23). The pregnant females were infected near  
200 mid-gestation (between 86 and 95 days of gestation [dG]; term is approx. 181 dG).  
201 Maternal blood and saliva samples were obtained on the day of inoculation (day 0) as  
202 well as at 4, 7, 11, 14, 21, and 28 days post infection (dpi). Cervico-vaginal washings  
203 were completed utilizing 3 mL of normal saline loaded into a 5 mL syringe with a  
204 catheter tip then injected onto the cervix and posterior vaginal fornix and subsequently  
205 recollected. These were obtained on days -4 (pre-wash), 4, 11, 14, 21, and 28 post  
206 infection. Ultrasound evaluation of fetal viability was completed with each inoculation and  
207 inter-inoculation specimen collection. Whole blood was collected into EDTA tubes.  
208 Saliva and vaginal samples were collected by cotton roll salivette. The sampling  
209 procedure for each dam is detailed in **Table 1**.

210 At the end of the study for each animal, dams were sedated with ketamine, all maternal  
211 samples obtained as well as ultrasound measurements, then the animal rapidly  
212 euthanized with euthasol. A C-section was quickly performed, cord blood obtained and  
213 the fetus euthanized with euthasol. Maternal and fetal tissues were rapidly collected and  
214 samples were both fixed with 4 % paraformaldehyde and frozen on dry ice (stored at -  
215 80°C) for each tissue.

### 216 **Complete blood counts (CBCs)**

217 CBCs were obtained for all females on EDTA-anticoagulated whole blood samples  
218 collected on day 0 and subsequent days-post infection as shown in the experimental



219 timeline (Idexx ProCyte DX hematology analyzer; Idexx laboratories, ME). CBCs  
220 included analysis for red blood cells (RBCs), hemoglobin, hematocrit and platelet count.

221

### 222 **One-step quantitative reverse transcription PCR**

223 Primers and probes used for qRT-PCR were designed by Lanciotti et al (24) (**Table 2**).  
224 RNA was isolated from maternal and fetal tissues (**Table 3 and 4**) using QIAamp cador  
225 pathogen mini kit (Qiagen, Valencia, CA). ZIKV RNA was quantitated by one-step  
226 quantitative real time reverse transcription PCR using QuantiTect probe RT-PCR kit  
227 (Qiagen) on an iCycler instrument (BioRad). Primers and probes were used at a  
228 concentration of 0.4  $\mu$ M and 0.2  $\mu$ M respectively and cycling conditions used were 50°C  
229 for 30 min, 95°C for 15 min followed by 40 cycles of 94°C for 15 s and 60°C for 1 min.  
230 Concentration of the viral RNA (copies/milliliter) was determined by interpolation onto a  
231 standard curve of six 10-fold serial dilutions ( $10^6$  to  $10^1$  copies/ml) of a synthetic ZIKV  
232 RNA fragment available commercially from ATCC (ATCC VR-3252SD). The cutoff for  
233 limit of detection of ZIKV RNA was  $1 \times 10^2$ .

### 234 **ZIKV ELISA**

235 ZIKA specific IgM and IgG antibody responses were assessed in the serum samples  
236 using the commercially available anti-ZIKV IgM (#ab213327, Abcam, Cambridge, MA)  
237 and IgG (#Sp856C, XpressBio, Fredrick, MD) ELISA kits. Briefly, a 1:100 for IgM and  
238 1:50 for IgG serum dilution was performed in duplicate and added to the pre-coated  
239 plates available in the kits. The assays were performed using the manufacturer's  
240 instructions and the assay was read at 450 nm for IgM and 405 nm for IgG antibodies in  
241 the serum.

242

### 243 **Immunofluorescence**

244 For IF, slides were baked for one hour at 56°C, deparaffinized, and HIER was performed  
245 in the Retriever 2100 with R-Universal Epitope Recovery Buffer (62719-10 lot 180314).  
246 After retrieval, slides were blocked in 5% normal donkey serum for 1 hour, then primary  
247 antibodies in 0.5% normal serum were added and incubated overnight, humidified, at  
248 4°C [MAC-387, macrophage antibody (Abcam, MA); Pan anti-flavivirus; (Millipore, CA)].  
249 The next morning slides were removed from 4°C and allowed to equilibrate to RT,  
250 covered, on the benchtop for 1 hour. Slides were rinsed 4 x 5 minutes with PBS, then  
251 secondary antibodies were added and incubated 1 hour, covered, at RT. Donkey anti-  
252 mouse IgG F(ab')<sub>2</sub> AlexaFluor 594 (Jackson Immunolabs) was used as secondary  
253 antibody. Slides were rinsed in PBS, counterstained 5 minutes with DAPI in PBS and  
254 cover slipped using Shur/Mount. Cover glass were sealed with nail polish and slides  
255 were stored at 4°C and visualized using a fluorescent microscope (Olympus BX40).  
256 Images were captured using CellSens imaging software (Olympus).

257

## 258 **RESULTS**

259

260

### 261 **Description of animal cohorts and experimental outline**

262

263 For this study, adult timed pregnant female olive baboons (n=6) were used. All baboons  
264 were infected via vaginal inoculation with a clinically relevant dose ( $1 \times 10^6$  pfu) of the  
265 French Polynesian (H/PF/2013) or the Puerto Rican (PRVABC59) ZIKV isolate. Blood,  
266 saliva, and cervico-vaginal washings were collected as shown in **Table 1**. In the FP  
267 cohort, 2/3 dams developed slight to negligible rash on the abdomen and in the inguinal  
268 and axillary regions and no conjunctivitis. One FP dam (FP1) presented with moderate  
269 rash on the abdomen, in the bilateral axillary and inguinal regions and mild  
270 conjunctivitis. In the PR cohort, 2/3 dams developed slight to negligible rash on the

271 abdomen and in the axillary/inguinal regions and only one dam (PR3) developed slight  
272 conjunctivitis. None of the animals showed signs of any other clinical disease. Baboons  
273 were euthanized at 28 dpi. Complete blood counts (CBCs) were evaluated for all  
274 females on EDTA-anticoagulated whole blood samples collected on day 0 and  
275 subsequent days post infection as shown in Table 1 (Idexx ProCytex DX hematology  
276 analyzer; Idexx laboratories, ME). RBC, hemoglobin and hematocrit numbers did not  
277 show any differences pre-and post ZIKV infection in all females (data not shown).  
278 Platelet counts did not change in response to ZIKV infection in any dam (data not  
279 shown).

280  
281

#### 282 **Viral load data post infection in whole blood and saliva**

283  
284 Viral RNA was quantified by one-step qRT-PCR in RNA extracted from the blood and  
285 saliva samples. ZIKV RNA was detected in the blood of all animals infected with the FP  
286 isolate of ZIKV and two of the three animals infected with the PR isolate of ZIKV (**Figure**  
287 **1**). Among the dams infected with the FP ZIKV isolate, ZIKV RNA was detected in the  
288 blood of all three dams, with dam FP1 viremic at 7 and 11 dpi, dam FP2 viremic at 4 and  
289 7 dpi and dam FP3 viremic at 4 and 7 dpi (**Figure 1A**). Among the dams infected with  
290 the PR ZIKV isolate, ZIKV RNA was detected in the blood of 2 of 3 dams; dam PR1 was  
291 viremic at 7, 11, 14 and 28 dpi, dam PR2 was viremic on 4, 7 and 14 dpi. ZIKV RNA  
292 was never detected in the blood of dam PR3 at any time point examined (4, 7, 11, 14,  
293 21, 28 or 35 dpi) (**Figure 1B**).

294 In the two dams infected with the FP ZIKV isolate, ZIKV RNA was detected in the saliva  
295 at 11 and 14 dpi (FP1) and on 11 dpi (FP2) (**Figure 1C**). In the two animals infected with  
296 the PR ZIKV isolate, ZIKV RNA was detected in the saliva at 11 dpi (PR1) and 7 and 14  
297 dpi (PR2) (**Figure 1D**).

298

299 **ZIKV shedding into cervico-vaginal washes (CVW)**

300 ZIKV RNA was detected in the CVW of all three dams infected with the FP isolate of  
301 ZIKV and two of the three dams infected with the PR isolate of ZIKV. ZIKV RNA was  
302 detected in the CVW at 4, 11, 14, 21 and 28 dpi in dam FP1, 11 and 14 dpi in dam FP2  
303 and 4 and 14 dpi in dam FP3 (**Figure 1E**). In the PR ZIKV infected dams, two had ZIKV  
304 RNA in the CVW; 4, 11, 14, 21 and 28 dpi for PR1 and 14 and 21 dpi for dam PR2  
305 (**Figure 1F**).

306

307 **ZIKV RNA in maternal tissues**

308 In maternal reproductive tissues (uterus, cervix, vagina, ovaries), ZIKV RNA was not  
309 detected in any of the animals inoculated with the FP ZIKV isolate. ZIKV RNA was  
310 detected in the uterus of two of the animals inoculated with the PR isolate (dams PR1, 2)  
311 and in the vagina of two dams (PR1, 3). ZIKV RNA was present in all of the maternal  
312 lymph nodes assessed (axial, mesenteric, inguinal) except for the mesenteric nodes of  
313 dam FP3 and the axial lymph nodes of dam PR3 (**Table 3**).

314

315

316 **ZIKV shedding into fetal tissues and placenta**

317 ZIKV RNA was not detected in any of the fetal tissues (cord blood, cortex, cerebellum,  
318 umbilical cord, fetal membranes, spleen, lung, liver, eye, gonads, stomach, intestine,  
319 and optic nerve; data not shown).

320 Placentas from each dam were sampled from six different locations (different  
321 cotyledons). In the animals infected with the FP ZIKV isolate, ZIKV RNA was not  
322 detected in any cotyledons sampled. In the animals infected with the PR isolate, ZIKV  
323 RNA was detected in two of the animals (PR1, 2). In one of these animals, ZIKV RNA

324 was detected in five cotyledons sampled (PR1), and in the other animal, ZIKV RNA was  
325 detected in four cotyledons sampled (PR2) (**Table 4**).

326

### 327 **ZIKV antibody response**

328

329 ZIKV IgM was detected in sera of 2 of 3 FP ZIKV isolate infected dams (FP1, 2) on day  
330 14 and in sera of dam FP3 by day 21 post infection (**Figure 2A**). ZIKV IgM was detected  
331 in 2 of 3 PR isolate dams (PR1, 2) by day 11 post infection and in dam PR3 on day 18  
332 post infection (**Figure 2B**). ZIKV IgG was detected in sera of dams FP 1 and 2 on day 21  
333 and by day 35 post infection in the sera of dam FP3 (**Figure 2C**). In the PR isolate  
334 cohort, dams PR1 and 2 had detectable ZIKV IgG in sera on day 21 post infection and  
335 day 32 post infection in dam PR 3 (**Figure 2D**).

336

337

338

### 339 **Immunohistochemistry**

340

#### 341 **Cervix**

342 ZIKV immunofluorescence (IF; pan flavivirus) was observed in the cervix of one dam  
343 infected with the French Polynesian ZIKV isolate (FP1) but not in dams FP2 or FP3. In  
344 FP1, the ZIKV IF pattern was localized to the epithelial layer in both the endocervical  
345 (upper cervix) and ectocervical (lower cervix, exterior os) regions. In the simple  
346 columnar epithelium characteristic of the endocervix, the strongest IF resided near the  
347 basal lamina separating the epithelium and stromal layers with diffuse IF observed in the  
348 epithelial layer (**Figure 3A**). In the ectocervix, the stratified squamous epithelium  
349 exhibited ZIKV IF in cells throughout the epithelium from the surface to the basal lamina  
350 cell layer. No ZIKV IF was noted in this dam in the cervical stroma. ZIKV IF was  
351 observed in the cervix of 3/3 dams infected with the Puerto Rican ZIKV isolate (**Figure**

352 **3)**. In these dams, ZIKV IF was observed in the epithelial layer of both the endo- and  
353 ectocervix with a more intense IF compared to the dam infected with the French  
354 Polynesian isolate. In addition, occasional cells exhibited ZIKV IF in the cervical stroma,  
355 potentially representing either isolated stromal cells or invading immune cells such as  
356 macrophages or neutrophils. In addition, an occasional cervical gland was observed to  
357 exhibit ZIKV IF (**Figure 3**).

358 In the cervix of the French Polynesian and Puerto Rican ZIKV isolate infected  
359 dams that exhibited cervical ZIKV IF, macrophages were frequently observed in the  
360 stromal layer juxtaposed to the epithelial layer (**Figure 4**). Puerto Rican isolate infected  
361 dams (PR1, 2) exhibited a greater infiltration of macrophages into the stroma compared  
362 to FP1 with macrophages being observed both adjacent to the epithelial layer as well as  
363 deeper in the stromal layer (**Figure 4C**). In the French Polynesian isolate infected dams  
364 that did not exhibit cervical ZIKV IF, only occasional macrophages were observed in the  
365 stroma (**Figure 4D**).

366

### 367 **Uterus**

368 No Zika virus (pan flavivirus) IF was observed in the myometrium of any dam infected  
369 with either French Polynesian or Puerto Rican ZIKV isolate (**Figure 7**). Occasional  
370 clusters of ZIKV IF positive cells were observed in the endometrium of the two dams  
371 infected with the Puerto Rican isolate that were ZIKV RNA positive in the uterus, but not  
372 in the dams infected with the French Polynesian isolate or the one dam infected with the  
373 Puerto Rican isolate that did not have detectable ZIKV RNA in the uterus. We did not  
374 detect macrophages in any of the uterine sections examined from any animal.

375

### 376 **Placenta and fetal membranes**

377 The dams infected with the French Polynesian ZIKV isolate were negative for ZIKV IF in  
378 the placenta and fetal membranes. ZIKV IF (pan flavivirus) in the placentas of Dams  
379 PR1 and PR2 (both positive for placental ZIKV RNA) demonstrated the presence of  
380 ZIKV, localized primarily in the syncytial layer with regions exhibiting greater intensity  
381 **(Figure 5)**. In these two dams, we observed ZIKV IF in the amnion epithelium (PR1) and  
382 in both the amnion and chorion/decidua of the fetal membranes. Of note, the fetal  
383 membranes examined in this study were adjacent to the utero-placental interface and  
384 not the more distal membranes. We did not observe macrophage IF in these sections  
385 **(Figure 6)**.

386

## 387 **DISCUSSION**

388

389

390 In the present study, we describe the ZIKV infection of six timed-pregnant olive  
391 baboons at mid-gestation (86-95 dG; term ~183 dG) following vaginal deposition of 1 mL  
392 baboon semen containing  $1 \times 10^6$  pfu of either the FP or the PR isolates of ZIKV. We  
393 chose the FP isolate based on our prior study where we demonstrated vertical transfer  
394 following subcutaneous inoculation with the FP isolate that resulted in both fetal demise  
395 as well pronounced fetal CNS pathology (25). A retrospective study of the ZIKV  
396 epidemic in French Polynesia (circa 2013) noted that this was the first instance  
397 associating ZIKV to microcephaly and congenital ZIKA syndrome (CZS) (21, 26). It was  
398 later reported that the FP isolate differs from the ancestral Asian ZIKV lineage from  
399 which it was derived, with a mutation in the prM protein (S139N), which has been stably  
400 maintained throughout the virus's dissemination throughout the Americas (Fig 8). This  
401 mutation is associated with enhanced infectivity in human neural progenitor cells (NPCs)  
402 and yielded a more significant microcephaly in mice (27). We selected the PR isolate to  
403 compare to the FP isolate to examine for increased rates of vertical transfer, since it

404 harbors the S139N mutation and has also acquired several additional point mutations  
405 resulting in amino acid substitutions, some being common with the Brazilian isolate(s)  
406 (28). Similar to the increased incidence of CZS noted in the Brazilian ZIKV epidemic  
407 (compared to the French Polynesian estimates), a recent study by CDC reported that  
408 one in seven children born from women with confirmed or possible ZIKV infection during  
409 gestation in Puerto Rico had a birth defect or neurodevelopmental abnormality  
410 suggesting possible mutations in this ZIKV isolate may contribute to the increased viral  
411 replication and neurovirulence compared to the FP strain (29).

412

413 In the current study, ZIKV inoculations were repeated at seven-day intervals until  
414 viremia was evident via qPCR or through three inoculations if no viremia was observed  
415 (one PR infected dam). We chose multiple inoculations to mimic probably repeat  
416 intercourse in human couples. Viremia was achieved in all dams except one of the three  
417 baboons inoculated with the PR isolate noted between days 4 and 14 post infection (Fig  
418 1). In those animals inoculated with the FP isolate, resolution was noted by day 14 post  
419 infection, while in dams inoculated with the PR isolate, one dam had resolution by day  
420 11 post infection with reemergence at day 14 post infection with resolution noted again  
421 at day 21 post infection (PR 2). The other PR dam (PR 1) had resolution by day 21 post  
422 infection and reemergence at day 28 post infection. The course of viremia in response to  
423 vaginal delivery of ZIKV infected semen differed from that described in our previous  
424 study in mid-gestation pregnant baboons subcutaneously inoculated with FP isolate of  
425 ZIKV where viremia was resolved by 14 dpi (25). Therefore, the route of infection with  
426 ZIKV seems to affect the length of viremia and may even affect resolution and re-  
427 emergence of the virus. We can speculate that the re-emergence of the virus could be  
428 attributed to the virus from several reservoirs where ZIKV has been found to persist,  
429 including the gastrointestinal tract, the cerebrospinal fluid, and the lymph nodes. These



430 tissues have been shown to persistently harbor ZIKV despite a robust immune response  
431 (21, 25, 30-32). We found persistence of ZIKV RNA in both reproductive tissues as well  
432 as lymph nodes at the end of the study, serving as possible reservoirs for viral re-entry in  
433 the present study. While the lymph nodes were found to contain ZIKV RNA at the  
434 termination of the study in both FP and PR isolate inoculated dams, only the PR dams  
435 exhibited re-emergence of viremia (Table 3). This could be either strain related from an  
436 increased virulence of the PR isolate or from the reproductive tissues since only the PR  
437 isolate inoculated dams exhibited vaginal or uterine ZIKV RNA at the study termination.  
438 Unlike the paper by Müller et al (17) describing the inhibition of ZIKV infection of cells  
439 extracted from human anogenital tract and various human reproductive tissue explants  
440 by human semen treatment, we detected ZIKV infection in bodily fluids and tissues of  
441 dams infected vaginally by semen samples from ZIKA seronegative male baboons  
442 mixed with either FP or PR ZIKV isolate. Therefore, semen did not prevent ZIKV  
443 infection in baboons inoculated vaginally with ZIKV. Several studies in mice have also  
444 shown sexual transmission of ZIKV through mating of ZIKV infected male mice with  
445 ZIKV naïve female mice and *in utero* transmission in pregnant mice due to sexual  
446 transmission (20, 33, 34).

447         Studies have shown extended viremia in pregnant macaques following  
448 subcutaneous inoculation where viremia is characteristically prolonged for several weeks  
449 to months (35-37). It has been proposed that the prolonged or re-emergence of viremia  
450 in macaques could be from tissues harboring ZIKV including placenta (38). It is also  
451 noteworthy for the latter that only the PR isolate inoculated baboon dams exhibited ZIKV  
452 RNA in the placenta. In humans, viremia lasting up to 53 days has been reported (24),  
453 but more typically it is short in duration, lasting three to seven days (39). We cannot,  
454 however, discount the possibility that we could have seen extended viremia in the one

455 PR dam (PR1) post 28 dpi and/or re-emergence on a different time point in any of the  
456 dams had we extended the study for a longer duration rather than termination at 28dpi.  
457 In addition to the differences in viremia in terms of duration, resolution and re-  
458 emergence between the FP and the PR ZIKV isolates, it is of potential interest that the  
459 two dams inoculated with the PR isolate had viremia levels one to two orders of  
460 magnitude compared to the FP isolate inoculated dams (Fig 1). Whether this can be  
461 attributed to a greater capacity for infectivity by the PR isolate or simply variability in a  
462 small cohort study remains to be determined.

463         Despite viremia being observed in five of six dams, vaginal infection with FP and  
464 PR isolate presented with slight to negligible rash on the abdomen and in the axillary  
465 and inguinal regions with little or no conjunctivitis. Only one dam inoculated with FP  
466 isolate (FP1) presented with moderate rash and mild conjunctivitis. Dams infected with  
467 PR isolate presented with slight to negligible rash on the abdomen and bilateral axillary  
468 and inguinal regions with no conjunctivitis. One PR dam (PR3) presented with slight to  
469 mild rash on the lower abdomen, axillary and inguinal regions and slight to negligible  
470 conjunctivitis. None of the dams exhibited any other signs of decreased appetite, water  
471 intake, signs of fever or arthralgia. This lack of presentation of clinical signs after vaginal  
472 inoculation of ZIKV differed from the moderate to severe clinical signs we observed in all  
473 baboons (primarily rash and conjunctivitis) that we previously infected subcutaneously  
474 with the FP isolate in prior studies of mid-gestation pregnant baboons (24), as well as  
475 non-pregnant female baboons (21), and male baboons (15, 21). The difference in  
476 presentation of clinical signs is likely due to the different routes of ZIKV inoculation  
477 (subcutaneous vs vaginal) and is of significant clinical importance since, unlike,  
478 subcutaneous infection, ZIKV infection via sexual intercourse may be more

479 asymptomatic than usual and therefore, evade preventive measures which could  
480 preclude diagnosis, in particular in pregnancy.

481 In the FP cohort, ZIKV RNA was detected continuously in CVW of dam FP1 from  
482 4 through 28 dpi while resolving by 21dpi in dams FP2, 3. In the PR infected cohort,  
483 ZIKV RNA was detected in the CVW of dam PR1 from 4dpi through 28 dpi whereas in  
484 dam PR2, ZIKV RNA was not detected until 21dpi and resolved by 28dpi (Fig 1E,F).  
485 The delayed detection of ZIKV RNA in the wash of PR3 may reflect that this dam was  
486 not infected by vaginal semen inoculation until the 3<sup>rd</sup> attempt (day 14 post-initial  
487 inoculation) and also may help explain the lack of viremia observed in this dam. The  
488 longer presence of vRNA in CVW is distinct from blood and saliva and could contribute  
489 to the re-emergence of viremia in dam PR1 (14 days non viremic between last viremic  
490 time point and re-emergence) and dam PR2 (7 days non-viremic between last viremia  
491 time point and re-emergence). However, it is noteworthy that the FP dams did not show  
492 re-emergence of viremia even though one (FP1) had prolonged virus in the CVW (28  
493 dpi). This may be possibly related to differences in infectivity of the two isolates.

494 In addition to the fluid compartments, we found ZIKV RNA persisting in the lymph  
495 nodes of all animals from both FP and PR isolate cohorts. In rhesus macaques, ZIKV  
496 RNA has been detected in the lymph nodes for 5 to 6 weeks post infection (30).  
497 Presence of ZIKV in the lymph nodes is one possible route of disseminating the virus  
498 from vagina to the cervix and uterus. The lymphatic system may serve as a reservoir for  
499 ZIKV persistence as well as sites of re-emergence of the virus through viral shedding  
500 from the local lymphatic tissue, possibly on an intermittent basis, by supplying virus to  
501 glandular tissue (via local lymphatic vascular beds) leading to secretion into the bodily  
502 fluids. However, at this time, we do not know if the ZIKV found in the saliva, blood, lymph

503 nodes, reproductive tissues or cervico-vaginal washings at the termination of the study  
504 was infectious virus.

505         ZIKV RNA was not detected in any reproductive tissues of the dams infected with  
506 the FP isolate. However, cervical tissue of dam FP1 was found positive for ZIKV IF  
507 staining. The CVW samples of the other two FP dams were ZIKV positive only on days  
508 4, 11 and 14 and were not ZIKV positive by qPCR or IF staining. The CVW from dam  
509 FP1 was positive for ZIKV RNA from day 4 through 28 post infection. It is possible that  
510 our inability to detect ZIKV RNA in the cervix in this dam (and the others) is related to its  
511 restriction to the epithelial layer and not stroma. In the cervix, the majority of the tissue  
512 is stromal and our tissue sampling for RNA analysis excluded epithelium. Alternatively,  
513 since the epithelium represents such a small contribution to the total RNA from cervix (vs  
514 stroma) that ZIKV RNA was below the exclusion limit for detection ( $1 \times 10^2$  copies) that we  
515 set. In the PR isolate cohort, the cervix of all three dams were positive for ZIKV IF. Dams  
516 PR1 and 3 had detectable ZIKV RNA in the vaginal tissue. It is noteworthy that the  
517 vagina, which is continuous with the cervix, differs from the cervix in that it has a large  
518 stratified squamous epithelium that may help in harboring the virus. Dams PR1 and 2  
519 were positive for ZIKV (RNA and protein) in the uterus as well, and positive ZIKV IF  
520 staining in the fetal membranes and placenta of the same two PR infected dams  
521 suggests possible spread of ZIKV to the fetus per se had the study been for a longer  
522 duration. Dams PR1 and 2 had prolonged detection of ZIKV RNA in CVW samples  
523 possibly explaining positive ZIKV IF in the cervical tissue. Although CVW samples of  
524 dam PR 3 were negative for ZIKV RNA, cervical tissue was positive for ZIKV IF staining  
525 and ZIKV RNA was detected in the vaginal tissue. It is possible that ZIKV in this animal  
526 was restricted to select tissues such as the cervix, vagina and lymph nodes and  
527 remained tissue localized rather than replicate and spread as suggested by the lack of  
528 viremia after three inoculations and weak IgM and IgG response to ZIKV. The presence

529 of ZIKV virus in different reproductive tissues after vaginal transfer of the virus suggests  
530 that the reproductive organs in baboons may harbor ZIKV during the acute phase of  
531 ZIKV infection through sexual transmission.

532 Recruitment of macrophages into the cervical stroma has been described during  
533 late gestation and proposed as playing an essential role in the remodeling of cervical  
534 stroma tissue, essential for cervical ripening in preparation for parturition (40). The cervix  
535 is referred to as the “gatekeeper” of pregnancy and as such, a premature recruitment of  
536 immune cells into the cervix in response to lower reproductive tract infection has been  
537 proposed to induce premature loss of cervical integrity playing a key role in pre-term  
538 birth. Cervical macrophage infiltration is well reported in pre-term and term cervix in  
539 human and animal models (41). Abortion and preterm birth are well described in  
540 response to ZIKV in humans and NHPs including baboons, as we have described (25).  
541 Macrophages can induce cervical connective tissue remodeling via their expression of  
542 matrix metalloproteinases (MMPs), and various other factors that help in the breakdown  
543 of collagen and junction proteins resulting in the loss of cervical epithelial integrity  
544 required for cervical ripening (42). In relation to this, we observed ZIKV IF in the cervix of  
545 one FP isolate inoculated dam and all three PR isolate inoculated dams (Fig 3). For  
546 both isolates, the ZIKV IF was localized to the epithelial layer of the cervix in both endo-  
547 and ectocervical regions. The strongest ZIKV IF intensity was localized at the basal  
548 aspect of the epithelial cells at the junction with the stromal layer, which consists  
549 primarily of fibroblasts and smooth muscle cells. Macrophage IF was observed in both  
550 the FP isolate dam exhibiting ZIKV IF in cervical epithelium as well as all three ZIKV IF  
551 positive PR isolate dams in the epithelium (Fig 4). Relative to this, macrophages were  
552 routinely observed in the cervix of only the FP isolate dam with cervical ZIKV IF and the  
553 three PR isolate dams. In the FP dam, macrophages were observed in the stromal  
554 tissue immediately adjacent to the epithelium, indicative of recruitment (of monocytes) in

555 response to the virus itself or from a local inflammatory reaction in response to ZIKV  
556 infection of epithelial cells. In the PR infected dams, macrophages were also noted  
557 adjacent to the epithelial layer as well as deeper in the stromal tissue, possibly indicating  
558 potential breakdown of the epithelial-stromal barrier and entry of virus into the stromal  
559 tissue. In contrast, FP dams with no ZIKV IF staining in cervix had only occasional  
560 macrophage staining in the stromal layer, typically scattered throughout the stroma. It is  
561 possible that the recruitment of macrophages due to ZIKV infection of the cervix through  
562 vaginal route at mid-gestation may induce breakdown of epithelial cell barrier and  
563 integrity similar to during cervical ripening at term. This breakdown could potentially lead  
564 to viral access to the adjacent reproductive tissues such as the uterus and placenta but  
565 more importantly, fetal membranes which lie at the top of the cervical canal thus  
566 amniotic sac and fluid and ultimately, the fetal compartment, thus exposing the fetus to  
567 Zika viral infection.

568 Vertical transfer of ZIKV in macaques appear to be very efficient, described to  
569 occur at near 100% following infection using various isolates of ZIKV including FP (37,  
570 38), PR (31, 35, 43), BR (32, 44) and RIO (45, 46) isolates. While we observed no  
571 placental infection in the FP isolate inoculated pregnancies, vertical transfer to the  
572 placenta was observed (both RNA and IF) in two of the three animals infected with the  
573 PR isolate (Fig 5). In these two animals (dams PR1, 2), ZIKV RNA was detected in  
574 multiple cotyledons indicating widespread targeting of the placenta. Similar to our prior  
575 study infecting dams with the FP isolate (25), ZIKV IF was noted in the trophoblast cells.  
576 Since the one PR isolate inoculated dam without placental ZIKV targeting also was the  
577 dam with no noted viremia and latent detection in the CVW, this animal may have been  
578 infected by a later inoculation while it is clear that dams PR1 and 2 were infected at the  
579 first inoculation based on viremia, exhibited ZIKV RNA in the uterus and had prolonged

580 ZIKV in the CVW. These dams also had notable ZIKV IF in the fetal membranes  
581 indicating that breakthrough of the virus through the placental barrier may have occurred  
582 since the membranes used for IF were at the uterus-placental interface or possibly via  
583 loss of cervical integrity leading to the opening of cervical canal and access to the  
584 membranes. While we found ZIKV RNA and IF in the placenta of two PR inoculated  
585 dams, there was no evidence of vertical transfer of the virus to any of the fetal  
586 compartments in any of the animals inoculated. The route of ZIKV infection,  
587 subcutaneous vs. vaginal may affect the rate and frequency of vertical transfer to the  
588 fetus per se. Considering the prolonged presence of virus in the CVW, the presence of  
589 ZIKV RNA and IF in placental trophoblasts and fetal membranes, and the unanticipated  
590 re-emergence of viremia (prolonged viremia) in these two PR inoculated dams, we  
591 predicted that vertical transfer would have occurred in these baboons at a later period,  
592 Further studies are needed to follow intravaginally ZIKV infected pregnant baboons for  
593 longer periods post-infection to better understand the fetal outcome of delayed viremia  
594 and potential re-emergence from immune privileged sites harboring ZIKV such as the  
595 lymph nodes.

596         With regard to the adaptive immune response to ZIKV infection, all six of the  
597 baboons inoculated with ZIKV developed ZIKV-specific IgM and IgG responses (Fig 2).  
598 IgM production following ZIKV infection was noted in all animals at variable times which  
599 indicated that the maternal immune system had access to the virus despite the lack of  
600 viremia in one of the three animals inoculated with the PR isolate. While, IgG titers were  
601 detected in all the dams 21 dpi, this was either too slow or inadequate to prevent spread  
602 of the virus to various reproductive tissues. It is noteworthy that the IgM and IgG  
603 response was also delayed in the dam inoculated with the FP isolate that displayed  
604 delayed viremia (11 dpi; FP3), being observed initially at 21 days (IgM) and 35 dpi (IgG).

605 Also, noteworthy, the one PR isolate infected dam that did not exhibit viremia had a  
606 similar weak IgM response (21 dpi) as well as IgG (35 dpi), with the immune cells likely  
607 being exposed to ZIKV via lymph nodes. It is unclear if these dams would have  
608 developed a robust neutralizing IgG response if examined at later times post-inoculation.  
609 As such, we can only speculate that some instances of sexual transmission of ZIKV may  
610 not result in a robust, neutralizing adaptive immune response.

611 While we acknowledge the small animal numbers in our study comparing PR and  
612 FP ZIKV isolates, there are clear indications that the PR isolate was more virulent in  
613 comparison to the FP isolate in terms of level of viremia, re-emergence of viremia,  
614 targeting of reproductive tissues and importantly, infection of the placenta and high  
615 potential for vertical transfer to the fetus per se. Few studies to date have focused on  
616 the effect of accumulated mutations in the virus acquired in the Americas compared to  
617 either the ancestral Asian isolate or the French Polynesian isolate that acquired the  
618 noted S139N substitution in the prM protein. Brazilian isolates, most notably the Rio  
619 isolate (RIO-U1/2016) acquired additional substitutions and the PR isolate differs in  
620 several other residues, some common with the Rio isolate (Fig 8). How these mutations  
621 may have increased virulence remains equivocal. However, viral modulation of the host  
622 immune response is a necessary factor for infection of the host and propagation of the  
623 progeny virus. All viruses must encode for at least one protein in their genome to  
624 modulate the host response to establish a successful infection. In the case of  
625 flaviviruses, many of the nonstructural proteins interact with cellular signaling cascades  
626 to instate a favorable environment for viral replication through resistance of host defense  
627 mechanisms (47). For flaviviruses, host response modulation is focused on the  
628 interferon response, and the level of modulation is directly proportional to pathogenicity  
629 as well as host species specificity (48). The increased virulence noted here for the  
630 Puerto Rican Strain (PRVABC59) compared to the isolate from French Polynesia



631 (H/FP/2013) could be interpreted as a difference in modulation of host response.  
632 Alignment of the complete polyprotein from H/PF/2013, Brazilian RIO isolate, and  
633 PRVABC59, revealed specific amino acid changes in non-structural proteins NS1  
634 (Lys1059→Glu) and NS5 (Ala2611→Val) of PRVABC59 that were not present in either  
635 H/PF/2013 or the RIO isolate (Fig 8). NS1 and NS5 play important roles in flavivirus  
636 replication, but have also been implicated in modulation of the host response through  
637 interaction with a variety of host proteins (49-51). Targeting of the interferon response by  
638 NS1 and NS5 has been documented for multiple flaviviruses including ZIKV (52-54) and  
639 the inhibition of IFN $\beta$  by NS1 can be mapped to a specific amino acid residue (49).  
640 Considering this, along with the multiple and complex ways flavivirus non-structural  
641 proteins manipulate the host response, the single amino acid changes identified in NS1  
642 and NS5 for PRVABC59 could account for the increase in virulence for this specific  
643 isolate through altered interactions with host cellular proteins. However, further  
644 investigation is necessary to confirm this hypothesis. Domain III of the flavivirus  
645 envelope protein participates in receptor recognition and contains linear epitopes  
646 recognized by neutralizing antibodies (55). Interestingly, the single amino acid change in  
647 the envelope protein of PRVABC59 resides in domain III (Val620→Leu, Fig 8). This  
648 could possibly be due to the selective pressure of neutralizing antibodies as the virus  
649 moved from French Polynesia through Brazil into Puerto Rico. However, the two  
650 residues are highly similar hydrophobic amino acids, and it is highly likely the change is  
651 of no consequence to viral pathogenicity.

652 In conclusion, this study further clarified the transmission of ZIKV following  
653 intravaginal inoculation during pregnancy in a novel non-human primate model. This  
654 important translational model not only more closely recapitulates the course of observed  
655 infection patterns in humans, it also offers a novel comparator of the infectivity of two  
656 contemporary ZIKV isolates. The FP isolate, which was more rarely associated with

657 vertical transmission than the PR isolate, appears to follow the same pattern within this  
658 study, which is logical given that ZIKV has continued to mutate during its passage from  
659 French Polynesia to the Americas. Future studies, some of which our lab is currently  
660 undertaking, can focus on the long-term outcomes of ZIKV viral infection following  
661 vaginal inoculation during early and mid-gestation in pregnancies that are allowed to  
662 continue gestating until term. This would be of value as sexual transmission of  
663 flaviviruses such as ZIKV may allow viral persistence or transmission to geographic  
664 locales when mosquito transmission is less likely, such as in the winter season. It is also  
665 a potential mechanism by which ZIKV infection can be spread to a population naïve to  
666 the ZIKV infection. Additionally, the course of ZIKV infection following sexual  
667 transmission and its consequences to the fetus appear different from subcutaneous  
668 ZIKV infection and what that means for the developing fetus and vaccine development is  
669 yet to be elucidated. This knowledge may help develop guidelines, preventative  
670 measures and therapeutics to protect against sexual transmission of ZIKV.

671

## 672 **ACKNOWLEDGEMENTS**

673 Oklahoma Baboon Research Resource; Helen Lazear, University of North Carolina  
674 Chapel Hill, Mukesh Kumar, Georgia State University, Atlanta, GA, for providing ZIKV  
675 stocks; Oklahoma medical research foundation (OMRF) for tissue processing and  
676 immunostaining and James Tomasek, Vice President for Research, University of  
677 Oklahoma Health Sciences Center.

678

679

680

681

682

683 **LIST OF REFERENCES**

- 684 1. **Frieden TR, Schuchat A, Petersen LR.** 2016. Zika Virus 6 Months Later. *Jama*  
685 **316:1443-1444.**
- 686 2. **Eppes C, Rac M, Dunn J, Versalovic J, Murray KO, Suter MA, Sanz Cortes M,**  
687 **Espinoza J, Seferovic MD, Lee W, Hotez P, Mastrobattista J, Clark SL, Belfort MA,**  
688 **Aagaard KM.** 2017. Testing for Zika virus infection in pregnancy: key concepts to  
689 deal with an emerging epidemic. *Am J Obstet Gynecol* **216:209-225.**
- 690 3. **Rasmussen SA, Jamieson DJ, Honein MA, Petersen LR.** 2016. Zika Virus and Birth  
691 Defects--Reviewing the Evidence for Causality. *N Engl J Med* **374:1981-1987.**
- 692 4. **Allard A, Althouse BM, Hebert-Dufresne L, Scarpino SV.** 2017. The risk of  
693 sustained sexual transmission of Zika is underestimated. *PLoS Pathog* **13:e1006633.**
- 694 5. **Coelho FC, Durovni B, Saraceni V, Lemos C, Codeco CT, Camargo S, de Carvalho**  
695 **LM, Bastos L, Arduini D, Villela DA, Armstrong M.** 2016. Higher incidence of Zika  
696 in adult women than adult men in Rio de Janeiro suggests a significant contribution  
697 of sexual transmission from men to women. *Int J Infect Dis* **51:128-132.**
- 698 6. **Grischott F, Puhan M, Hatz C, Schlagenhauf P.** 2016. Non-vector-borne  
699 transmission of Zika virus: A systematic review. *Travel Med Infect Dis* **14:313-330.**
- 700 7. **Davidson A, Slavinski S, Komoto K, Rakeman J, Weiss D.** 2016. Suspected  
701 Female-to-Male Sexual Transmission of Zika Virus - New York City, 2016. *MMWR*  
702 *Morb Mortal Wkly Rep* **65:716-717.**
- 703 8. **Arzuaga M, Bujalance SG, Diaz-Menendez M, Vazquez A, Arribas JR.** 2016.  
704 Probable sexual transmission of Zika virus from a vasectomised man. *Lancet Infect*  
705 *Dis* **16:1107.**
- 706 9. **Coelho AVC, Crovella S.** 2017. Microcephaly Prevalence in Infants Born to Zika  
707 Virus-Infected Women: A Systematic Review and Meta-Analysis. *Int J Mol Sci* **18.**
- 708 10. **Foy BD, Kobylinski KC, Chilson Foy JL, Blitvich BJ, Travassos da Rosa A,**  
709 **Haddow AD, Lanciotti RS, Tesh RB.** 2011. Probable non-vector-borne  
710 transmission of Zika virus, Colorado, USA. *Emerg Infect Dis* **17:880-882.**
- 711 11. **Hall V, Walker WL, Lindsey NP, Lehman JA, Kolsin J, Landry K, Rabe IB, Hills SL,**  
712 **Fischer M, Staples JE, Gould CV, Martin SW.** 2018. Update: Noncongenital Zika  
713 Virus Disease Cases - 50 U.S. States and the District of Columbia, 2016. *MMWR Morb*  
714 *Mortal Wkly Rep* **67:265-269.**
- 715 12. **Oliveira DB, Almeida FJ, Durigon EL, Mendes EA, Braconi CT, Marchetti I,**  
716 **Andreata-Santos R, Cunha MP, Alves RP, Pereira LR, Melo SR, Neto DF,**  
717 **Mesquita FS, Araujo DB, Favoretto SR, Safadi MA, Ferreira LC, Zanotto PM,**  
718 **Botosso VF, Berezin EN.** 2016. Prolonged Shedding of Zika Virus Associated with  
719 Congenital Infection. *N Engl J Med* **375:1202-1204.**
- 720 13. **Desclaux A, de Lamballerie X, Leparc-Goffart I, Vilain-Parce A, Coatleven F,**  
721 **Fleury H, Malvy D.** 2018. Probable Sexually Transmitted Zika Virus Infection in a  
722 Pregnant Woman. *N Engl J Med* **378:1458-1460.**
- 723 14. **Nicastri E, Castilletti C, Liuzzi G, Iannetta M, Capobianchi MR, Ippolito G.** 2016.  
724 Persistent detection of Zika virus RNA in semen for six months after symptom onset  
725 in a traveller returning from Haiti to Italy, February 2016. *Euro Surveill* **21.**
- 726 15. **Peregrine J, Gurung S, Lindgren MC, Husain S, Zavy MT, Myers DA, Papin JF.**  
727 2019. Zika virus infection, reproductive organ targeting, and semen transmission in  
728 the male olive baboon. *J Virol* doi:10.1128/JVI.01434-19.
- 729 16. **Yockey LJ, Varela L, Rakib T, Khoury-Hanold W, Fink SL, Stutz B, Szigeti-Buck**  
730 **K, Van den Pol A, Lindenbach BD, Horvath TL, Iwasaki A.** 2016. Vaginal Exposure

- 731 to Zika Virus during Pregnancy Leads to Fetal Brain Infection. *Cell* **166**:1247-1256  
732 e1244.
- 733 17. **Muller JA, Harms M, Kruger F, Gross R, Joas S, Hayn M, Dietz AN, Lippold S, von**  
734 **Einem J, Schubert A, Michel M, Mayer B, Cortese M, Jang KS, Sandi-Monroy N,**  
735 **Deniz M, Ebner F, Vapalahti O, Otto M, Bartenschlager R, Herbeuval JP,**  
736 **Schmidt-Chanasit J, Roan NR, Munch J.** 2018. Semen inhibits Zika virus infection  
737 of cells and tissues from the anogenital region. *Nat Commun* **9**:2207.
- 738 18. **Russell K, Hills SL, Oster AM, Porse CC, Danyluk G, Cone M, Brooks R, Scotland**  
739 **S, Schiffman E, Fredette C, White JL, Ellingson K, Hubbard A, Cohn A, Fischer M,**  
740 **Mead P, Powers AM, Brooks JT.** 2017. Male-to-Female Sexual Transmission of Zika  
741 Virus-United States, January-April 2016. *Clin Infect Dis* **64**:211-213.
- 742 19. **Deckard DT, Chung WM, Brooks JT, Smith JC, Woldai S, Hennessey M, Kwit N,**  
743 **Mead P.** 2016. Male-to-Male Sexual Transmission of Zika Virus--Texas, January  
744 2016. *MMWR Morb Mortal Wkly Rep* **65**:372-374.
- 745 20. **Duggal NK, McDonald EM, Ritter JM, Brault AC.** 2018. Sexual transmission of Zika  
746 virus enhances in utero transmission in a mouse model. *Sci Rep* **8**:4510.
- 747 21. **Gurung S, Preno AN, Dubaut JP, Nadeau H, Hyatt K, Reuter N, Nehete B, Wolf**  
748 **RF, Nehete P, Dittmer DP, Myers DA, Papin JF.** 2018. Translational Model of Zika  
749 Virus Disease in Baboons. *J Virol* doi:10.1128/jvi.00186-18.
- 750 22. **Styer LM, Kent KA, Albright RG, Bennett CJ, Kramer LD, Bernard KA.** 2007.  
751 Mosquitoes inoculate high doses of West Nile virus as they probe and feed on live  
752 hosts. *PLoS Pathog* **3**:1262-1270.
- 753 23. **Dudley DM, Newman CM, Lalli J, Stewart LM, Koenig MR, Weiler AM, Semler**  
754 **MR, Barry GL, Zarbock KR, Mohns MS, Breitbart ME, Schultz-Darken N,**  
755 **Peterson E, Newton W, Mohr EL, Capuano Iii S, Osorio JE, O'Connor SL,**  
756 **O'Connor DH, Friedrich TC, Aliota MT.** 2017. Infection via mosquito bite alters  
757 Zika virus tissue tropism and replication kinetics in rhesus macaques. *Nat Commun*  
758 **8**:2096.
- 759 24. **Lanciotti RS, Kosoy OL, Laven JJ, Velez JO, Lambert AJ, Johnson AJ, Stanfield SM,**  
760 **Duffy MR.** 2008. Genetic and serologic properties of Zika virus associated with an  
761 epidemic, Yap State, Micronesia, 2007. *Emerg Infect Dis* **14**:1232-1239.
- 762 25. **Gurung S, Reuter N, Preno A, Dubaut J, Nadeau H, Hyatt K, Singleton K, Martin**  
763 **A, Parks WT, Papin JF, Myers DA.** 2019. Zika virus infection at mid-gestation  
764 results in fetal cerebral cortical injury and fetal death in the olive baboon. *PLoS*  
765 *Pathog* **15**:e1007507.
- 766 26. **Cauchemez S, Besnard M, Bompard P, Dub T, Guillemette-Artur P, Eyrolle-**  
767 **Guignot D, Salje H, Van Kerkhove MD, Abadie V, Garel C, Fontanet A, Mallet HP.**  
768 2016. Association between Zika virus and microcephaly in French Polynesia, 2013-  
769 15: a retrospective study. *Lancet* **387**:2125-2132.
- 770 27. **Yuan L, Huang XY, Liu ZY, Zhang F, Zhu XL, Yu JY, Ji X, Xu YP, Li G, Li C, Wang HJ,**  
771 **Deng YQ, Wu M, Cheng ML, Ye Q, Xie DY, Li XF, Wang X, Shi W, Hu B, Shi PY, Xu**  
772 **Z, Qin CF.** 2017. A single mutation in the prM protein of Zika virus contributes to  
773 fetal microcephaly. *Science* **358**:933-936.
- 774 28. **Agrelli A, de Moura RR, Crovella S, Brandao LAC.** 2019. Mutational landscape of  
775 Zika virus strains worldwide and its structural impact on proteins. *Gene* **708**:57-62.
- 776 29. **Rice ME, Galang RR, Roth NM, Ellington SR, Moore CA, Valencia-Prado M, Ellis**  
777 **EM, Tufa AJ, Taulung LA, Alfred JM, Perez-Padilla J, Delgado-Lopez CA, Zaki SR,**  
778 **Reagan-Steiner S, Bhatnagar J, Nahabedian JF, 3rd, Reynolds MR, Yeargin-**  
779 **Allsopp M, Viens LJ, Olson SM, Jones AM, Baez-Santiago MA, Oppong-Twene P,**  
780 **VanMaldeghem K, Simon EL, Moore JT, Polen KD, Hillman B, Ropeti R, Nieves-**

- 781 Ferrer L, Marcano-Huertas M, Masao CA, Anzures EJ, Hansen RL, Jr., Perez-  
782 Gonzalez SI, Espinet-Crespo CP, Luciano-Roman M, Shapiro-Mendoza CK,  
783 Gilboa SM, Honein MA. 2018. Vital Signs: Zika-Associated Birth Defects and  
784 Neurodevelopmental Abnormalities Possibly Associated with Congenital Zika Virus  
785 Infection - U.S. Territories and Freely Associated States, 2018. *MMWR Morb Mortal*  
786 *Wkly Rep* **67**:858-867.
- 787 30. Aid M, Abbink P, Larocca RA, Boyd M, Nityanandam R, Nanayakkara O,  
788 Martinot AJ, Moseley ET, Blass E, Borducchi EN, Chandrashekar A, Brinkman  
789 AL, Molloy K, Jetton D, Tartaglia LJ, Liu J, Best K, Perelson AS, De La Barrera RA,  
790 Lewis MG, Barouch DH. 2017. Zika Virus Persistence in the Central Nervous  
791 System and Lymph Nodes of Rhesus Monkeys. *Cell* **169**:610-620.e614.
- 792 31. Hirsch AJ, Smith JL, Haese NN, Broeckel RM, Parkins CJ, Kreklywich C,  
793 DeFilippis VR, Denton M, Smith PP, Messer WB, Colgin LM, Ducore RM, Grigsby  
794 PL, Hennebold JD, Swanson T, Legasse AW, Axthelm MK, MacAllister R, Wiley  
795 CA, Nelson JA, Streblow DN. 2017. Zika Virus infection of rhesus macaques leads to  
796 viral persistence in multiple tissues. *PLoS Pathog* **13**:e1006219.
- 797 32. Coffey LL, Pesavento PA, Keesler RI, Singapuri A, Watanabe J, Watanabe R, Yee  
798 J, Bliss-Moreau E, Cruzen C, Christe KL, Reader JR, von Morgenland W, Gibbons  
799 AM, Allen AM, Linnen J, Gao K, Delwart E, Simmons G, Stone M, Lanteri M,  
800 Bakkour S, Busch M, Morrison J, Van Rompay KK. 2017. Zika Virus Tissue and  
801 Blood Compartmentalization in Acute Infection of Rhesus Macaques. *PLoS One*  
802 **12**:e0171148.
- 803 33. Clancy CS, Van Wettre AJ, Morrey JD, Julander JG. 2018. Coitus-Free Sexual  
804 Transmission of Zika Virus in a Mouse Model. *Sci Rep* **8**:15379.
- 805 34. Uraki R, Jurado KA, Hwang J, Szigeti-Buck K, Horvath TL, Iwasaki A, Fikrig E.  
806 2017. Fetal Growth Restriction Caused by Sexual Transmission of Zika Virus in Mice.  
807 *J Infect Dis* **215**:1720-1724.
- 808 35. Hirsch AJ, Roberts VHJ, Grigsby PL, Haese N, Schabel MC, Wang X, Lo JO, Liu Z,  
809 Kroenke CD, Smith JL, Kelleher M, Broeckel R, Kreklywich CN, Parkins CJ,  
810 Denton M, Smith P, DeFilippis V, Messer W, Nelson JA, Hennebold JD, Grafe M,  
811 Colgin L, Lewis A, Ducore R, Swanson T, Legasse AW, Axthelm MK, MacAllister  
812 R, Moses AV, Morgan TK, Frias AE, Streblow DN. 2018. Zika virus infection in  
813 pregnant rhesus macaques causes placental dysfunction and immunopathology. *Nat*  
814 *Commun* **9**:263.
- 815 36. Carroll T, Lo M, Lanteri M, Dutra J, Zarbock K, Silveira P, Rourke T, Ma ZM,  
816 Fritts L, O'Connor S, Busch M, Miller CJ. 2017. Zika virus preferentially replicates  
817 in the female reproductive tract after vaginal inoculation of rhesus macaques. *PLoS*  
818 *Pathog* **13**:e1006537.
- 819 37. Nguyen SM, Antony KM, Dudley DM, Kohn S, Simmons HA, Wolfe B, Salamat MS,  
820 Teixeira LBC, Wiepz GJ, Thoong TH, Aliota MT, Weiler AM, Barry GL, Weisgrau  
821 KL, Vosler LJ, Mohns MS, Breitbach ME, Stewart LM, Rasheed MN, Newman CM,  
822 Graham ME, Wieben OE, Turski PA, Johnson KM, Post J, Hayes JM, Schultz-  
823 Darken N, Schotzko ML, Eudailey JA, Permar SR, Rakasz EG, Mohr EL, Capuano  
824 S, 3rd, Tarantal AF, Osorio JE, O'Connor SL, Friedrich TC, O'Connor DH, Golos  
825 TG. 2017. Highly efficient maternal-fetal Zika virus transmission in pregnant rhesus  
826 macaques. *PLoS Pathog* **13**:e1006378.
- 827 38. Dudley DM, Aliota MT, Mohr EL, Weiler AM, Lehrer-Brey G, Weisgrau KL,  
828 Mohns MS, Breitbach ME, Rasheed MN, Newman CM, Gellerup DD, Moncla LH,  
829 Post J, Schultz-Darken N, Schotzko ML, Hayes JM, Eudailey JA, Moody MA,  
830 Permar SR, O'Connor SL, Rakasz EG, Simmons HA, Capuano S, Golos TG, Osorio

- 831 **JE, Friedrich TC, O'Connor DH.** 2016. A rhesus macaque model of Asian-lineage  
832 Zika virus infection. *Nat Commun* **7**:12204.
- 833 39. **Brasil P, Pereira JP, Jr., Moreira ME, Ribeiro Nogueira RM, Damasceno L,**  
834 **Wakimoto M, Rabello RS, Valderramos SG, Halai UA, Salles TS, Zin AA, Horovitz**  
835 **D, Daltro P, Boechat M, Raja Gabaglia C, Carvalho de Sequeira P, Pilotto JH,**  
836 **Medialdea-Carrera R, Cotrim da Cunha D, Abreu de Carvalho LM, Pone M,**  
837 **Machado Siqueira A, Calvet GA, Rodrigues Baiao AE, Neves ES, Nassar de**  
838 **Carvalho PR, Hasue RH, Marschik PB, Einspieler C, Janzen C, Cherry JD, Bispo**  
839 **de Filippis AM, Nielsen-Saines K.** 2016. Zika Virus Infection in Pregnant Women in  
840 Rio de Janeiro. *N Engl J Med* **375**:2321-2334.
- 841 40. **Yellon SM.** 2017. Contributions to the dynamics of cervix remodeling prior to term  
842 and preterm birth. *Biol Reprod* **96**:13-23.
- 843 41. **Nold C, Jensen T, O'Hara K, Stone J, Yellon SM, Vella AT.** 2019. Replens prevents  
844 preterm birth by decreasing type I interferon strengthening the cervical epithelial  
845 barrier. *Am J Reprod Immunol* doi:10.1111/aji.13192:e13192.
- 846 42. **Myers DA.** 2012. The recruitment and activation of leukocytes into the immune  
847 cervix: further support that cervical remodeling involves an immune and  
848 inflammatory mechanism. *Biol Reprod* **87**:107.
- 849 43. **Mohr EL, Block LN, Newman CM, Stewart LM, Koenig M, Semler M, Breitbach**  
850 **ME, Teixeira LBC, Zeng X, Weiler AM, Barry GL, Thoong TH, Wiepz GJ, Dudley**  
851 **DM, Simmons HA, Mejia A, Morgan TK, Salamat MS, Kohn S, Antony KM, Aliota**  
852 **MT, Mohns MS, Hayes JM, Schultz-Darken N, Schotzko ML, Peterson E, Capuano**  
853 **S, 3rd, Osorio JE, O'Connor SL, Friedrich TC, O'Connor DH, Golos TG.** 2018.  
854 Ocular and uteroplacental pathology in a macaque pregnancy with congenital Zika  
855 virus infection. *PLoS One* **13**:e0190617.
- 856 44. **Martinot AJ, Abbink P, Afacan O, Prohl AK, Bronson R, Hecht JL, Borducchi EN,**  
857 **Larocca RA, Peterson RL, Rinaldi W, Ferguson M, Didier PJ, Weiss D, Lewis MG,**  
858 **De La Barrera RA, Yang E, Warfield SK, Barouch DH.** 2018. Fetal Neuropathology  
859 in Zika Virus-Infected Pregnant Female Rhesus Monkeys. *Cell* **173**:1111-1122  
860 e1110.
- 861 45. **Maness NJ, Schouest B, Singapuri A, Dennis M, Gilbert MH, Bohm RP, Schiro F,**  
862 **Aye PP, Baker K, Van Rompay KKA, Lackner AA, Bonaldo MC, Blair RV, Permar**  
863 **SR, Coffey LL, Panganiban AT, Magnani D.** 2019. Postnatal Zika virus infection of  
864 nonhuman primate infants born to mothers infected with homologous Brazilian Zika  
865 virus. *Scientific reports* **9**:12802-12802.
- 866 46. **Magnani DM, Rogers TF, Maness NJ, Grubaugh ND, Beutler N, Bailey VK,**  
867 **Gonzalez-Nieto L, Gutman MJ, Pedreno-Lopez N, Kwal JM, Ricciardi MJ, Myers**  
868 **TA, Julander JG, Bohm RP, Gilbert MH, Schiro F, Aye PP, Blair RV, Martins MA,**  
869 **Falkenstein KP, Kaur A, Curry CL, Kallas EG, Desrosiers RC, Goldschmidt-**  
870 **Clermont PJ, Whitehead SS, Andersen KG, Bonaldo MC, Lackner AA,**  
871 **Panganiban AT, Burton DR, Watkins DI.** 2018. Fetal demise and failed antibody  
872 therapy during Zika virus infection of pregnant macaques. *Nat Commun* **9**:1624.
- 873 47. **Beachboard DC, Horner SM.** 2016. Innate immune evasion strategies of DNA and  
874 RNA viruses. *Curr Opin Microbiol* **32**:113-119.
- 875 48. **Ding Q, Gaska JM, Douam F, Wei L, Kim D, Balev M, Heller B, Ploss A.** 2018.  
876 Species-specific disruption of STING-dependent antiviral cellular defenses by the  
877 Zika virus NS2B3 protease. *Proceedings of the National Academy of Sciences of the*  
878 *United States of America* **115**:E6310-E6318.
- 879 49. **Xia H, Luo H, Shan C, Muruato AE, Nunes BT, Medeiros DBA, Zou J, Xie X,**  
880 **Giraldo MI, Vasconcelos PFC, Weaver SC, Wang T, Rajsbaum R, Shi PY.** 2018. An

- 881 evolutionary NS1 mutation enhances Zika virus evasion of host interferon induction.  
882 Nat Commun **9**:414.
- 883 50. **Best SM.** 2017. The Many Faces of the Flavivirus NS5 Protein in Antagonism of Type  
884 I Interferon Signaling. J Virol **91**.
- 885 51. **Zhou Y, Ray D, Zhao Y, Dong H, Ren S, Li Z, Guo Y, Bernard KA, Shi PY, Li H.**  
886 2007. Structure and function of flavivirus NS5 methyltransferase. J Virol **81**:3891-  
887 3903.
- 888 52. **Nazmi A, Dutta K, Hazra B, Basu A.** 2014. Role of pattern recognition receptors in  
889 flavivirus infections. Virus Res **185**:32-40.
- 890 53. **Suthar MS, Aguirre S, Fernandez-Sesma A.** 2013. Innate immune sensing of  
891 flaviviruses. PLoS Pathog **9**:e1003541.
- 892 54. **Wu Y, Liu Q, Zhou J, Xie W, Chen C, Wang Z, Yang H, Cui J.** 2017. Zika virus evades  
893 interferon-mediated antiviral response through the co-operation of multiple  
894 nonstructural proteins in vitro. Cell Discov **3**:17006.
- 895 55. **Zhang X, Jia R, Shen H, Wang M, Yin Z, Cheng A.** 2017. Structures and Functions of  
896 the Envelope Glycoprotein in Flavivirus Infections. Viruses **9**.

897

898

899

900

901

902

903

904

905

906

907

908

909

910

911

912

913

914

915 **FIGURE LEGENDS**

916

917 **Figure 1.** ZIKV RNA in blood (viremia, A, B), saliva (C, D) or cervico-vaginal washes (E,  
918 F) in mid-trimester baboons inoculated intra-vaginally with baboon semen containing  
919 either the FP or PR ZIKV isolates. ZIKV RNA was prepared from specimens collected  
920 from each animal at the indicated days post-infection and quantitated by one-step qRT-  
921 PCR.

922 **Figure 2.** Serum ZIKV IgM (A, B) and IgG (C, D) at the indicated days post-infection in  
923 mid-trimester baboons inoculated intra-vaginal with baboon semen containing either the  
924 FP or PR ZIKV isolates. The dashed lines represent the assay cutoff controls for IgM  
925 and IgG detection in each specific ELISA.

926 **Figure 3.** Pan flavivirus immunofluorescence (IF; panflavi, Red; DAPI, Blue) in the  
927 cervix. In the endocervix (A, B; upper cervix) ZIKV IF (dashed white arrows) was  
928 localized in the epithelium (denoted by the dashed lines) in both the endocervical region  
929 (A,B; simple columnar epithelium) and the ectocervix (CD; lower cervical-vaginal region,  
930 stratified squamous epithelium) in both PR and FP inoculated dams. In the FP isolate  
931 inoculated dam (FP1), intense ZIKV IF was observed at the interface of the epithelial-  
932 stromal junction in the endocervical region (A, B) with a broader distribution in the  
933 epithelium in the ectocervical region (C, D). In the PR isolate infected dams (B, D) a  
934 more intense ZIKV IF staining was noted in the epithelium of both the cervical regions as  
935 well as in occasional cells in the stroma (white arrow, B). In one PR isolate infected dam,  
936 ZIKV IF was also noted in the cervical glands (F, dashed white arrows). For  
937 comparison, a dam infected with the FP isolate (E) that did not exhibit ZIKV IF in either  
938 cervical region is shown. Small arrowheads denote auto-fluorescing red blood cells.



939 **Figure 4.** Immunofluorescent staining in the cervix for macrophages (Red; DAPI: Blue).  
940 In both FP isolate and PR isolate infected dams, abundant macrophages were observed,  
941 in the FP isolate infected dam that exhibited ZIKV IF (A, FP1), macrophages (dashed  
942 arrows) were primarily localized at or near the epithelial-stromal interface. In the PR  
943 isolate dams that were ZIKV IF positive, macrophages were localized at the both the  
944 epithelial-stromal interface region (B) as well as deeper in the stromal tissue (C). In  
945 dams that exhibited no ZIKV IF in the cervix, (D), only occasional macrophages were  
946 noted, typically in the deeper stromal layer.

947 **Figure 5.** Pan flavivirus immunofluorescence (IF, Red: flavivirus; blue: DAPI) staining in  
948 the placenta from a ZIKV RNA negative placenta from a dam infected with the FP isolate  
949 (A) demonstrating a lack of ZIKV IF in villous placenta. ZIKV IF was noted in occasional  
950 villous trophoblast in placenta from dams infected with the PR isolate (B, C; white  
951 arrows) consistent with ZIKV infection of the syncytial layer. Infection of the amnion  
952 epithelium was also observed (D; arrow). ZIKV IF was also observed in the  
953 chorion/decidual layer of the fetal membranes in a dam infected with the PR isolate (E.  
954 large arrow). Auto-fluorescing red blood cells are indicated with arrow heads.

955 **Figure 6.** Immunofluorescent staining in the placenta for macrophages (Red; DAPI:  
956 Blue). In both FP isolate infected dams, only an occasional macrophage was observed  
957 in the maternal and fetal compartments of the placenta (A: arrow). In the PR isolate  
958 dams that were ZIKV IF and RNA positive, macrophages were more abundant, in  
959 particular in the maternal compartment of the placenta (C: arrow). Arrowheads denote  
960 auto-fluorescing red blood cells.

961 **Figure 7.** Immunofluorescent staining in the uterus for ZIKV (Red; DAPI: Blue). ZIKV IF  
962 was not observed in the uterus, either endometrium or myometrium of FP isolate

963 infected dams (A, B). In the PR isolate infected dams, ZIKV IF was not observed in the  
964 myometrium and was occasionally observed in clusters of endometrial cells, (dashed  
965 arrows, D).

966 **Figure 8.** Amino acid variance among Zika virus isolates. The amino acid sequences for  
967 the FP (H/PF/2013; AHZ13508), PR (PRVABC59; AYI50388), and RIO (RIO-U1/2016;  
968 AMD16557) complete polyproteins were aligned using the Clustal Omega algorithm in  
969 Geneious Prime 2020.0.3 ([www.geneious.com](http://www.geneious.com)). Graphical representation of the ZIKV  
970 genome as well as the resulting protein products is indicated. Amino acid variances are  
971 highlighted in red with their position in the polyprotein noted by numerical annotation as  
972 well as the nonstructural protein where they reside. The S139N mutation in the prM  
973 protein is noted in all isolates for reference.

974

975

976

977

978

979

980

981

982

983

984

985

986

987

988

989

990 **Table 1. Inoculation and Sampling Procedures**

| Dam | Days Post-Initial Inoculation |      |   |      |    |      |    |    |
|-----|-------------------------------|------|---|------|----|------|----|----|
|     | -4                            | 0    | 4 | 7    | 11 | 14   | 21 | 28 |
| FP1 | Δ                             | X, O | Δ | X, O | Δ  | Δ    | Δ  | Ω  |
| FP2 | Δ                             | X, O | Δ | X, O | Δ  | Δ    | Δ  | Ω  |
| FP3 | Δ                             | X, O | Δ | X, O | Δ  | X, Δ | Δ  | Ω  |
| PR1 | Δ                             | X, O | Δ | X, O | Δ  | Δ    | Δ  | Ω  |
| PR2 | Δ                             | X, O | Δ | X, O | Δ  | Δ    | Δ  | Ω  |
| PR3 | Δ                             | X, O | Δ | X, O | Δ  | X, Δ | Δ  | Ω  |

6

X: Vaginal inoculation with ZIKV infected ( $1 \times 10^6$  pfu) baboon semen (1 mL) French Polynesian (n=3; FP1, FP2, FP3) or Puerto Rico isolate (n=3; PR1, PR2, PR3): Inoculations repeated at 7d intervals until evidence of viremia (qPCR)

O: Blood and saliva samples

Δ: Cervico-vaginal washings, blood and saliva samples

Ω: Maternal/fetal tissues, cervico-vaginal washings, blood and saliva samples were collected following euthanasia

Baboon semen was obtained via electro-ejaculation. All procedures were performed with IACUC approval.

991

992

993

994

995

996

997

998

999

1000

**Table 2. Primer/Probe sets for the detection of ZIKV by one step qRT-PCR**

|   | Primers             | Genome Position | Sequence (5'-3')                |
|---|---------------------|-----------------|---------------------------------|
| 1 | ZIKV 835 Forward    | 835–857         | TTGGTCATGATACTGCTGATTGC         |
|   | ZIKV 911 Reverse    | 890–911         | CCTTCCACAAAGTCCCTATTGC          |
|   | ZIKV 860-FAM Probe  | 860–886         | CGGCATACAGCATCAGGTGCATAGGAG     |
| 2 | ZIKV 1086 Forward   | 1086–1102       | CCGCTGCCCAACACAAG               |
|   | ZIKV 1162 Reverse   | 1162–1139       | CCACTAACGTTCTTTTGCAGACAT        |
|   | ZIKV 1107-FAM Probe | 1107–1137       | AGCCTACCTTGACAAGCAGTCAGACACTCAA |

1001  
1002  
1003  
1004  
1005  
1006  
1007  
1008  
1009  
1010  
1011  
1012  
1013  
1014

1015 **Table 3. ZIKV RNA (log) – Maternal Reproductive Tissues and Maternal Lymph**  
 1016 **nodes**  
 1017

|                                       | Maternal Reproductive Tissues – ZIKV RNA (log) |        |        |       | Maternal Lymph Nodes – ZIKV RNA (log) |            |        |
|---------------------------------------|------------------------------------------------|--------|--------|-------|---------------------------------------|------------|--------|
| <b>FRENCH POLYNESIAN (FP) ISOLATE</b> |                                                |        |        |       |                                       |            |        |
| Dam                                   | Uterus                                         | Cervix | Vagina | Ovary | Inguinal                              | Mesenteric | Axial  |
| FP1                                   | -                                              | -      | -      | -     | 2.5E05                                | 3.3E06     | 1.0E05 |
| FP2                                   | -                                              | -      | -      | -     | 7.6E05                                | 2.0E05     | 5.4E05 |
| FP3                                   | -                                              | -      | -      | -     | 7.7E03                                | -          | 5.0E03 |
| <b>PUERTO RICAN (PR) ISOLATE</b>      |                                                |        |        |       |                                       |            |        |
| PR1                                   | 3.2E03                                         | -      | 6.9E03 | -     | 2.7E03                                | -          | 4.1E03 |
| PR2                                   | 4.7E04                                         | -      | -      | -     | 2.7E05                                | 5.8E05     | 3.2E05 |
| PR3                                   | -                                              | -      | 2.8E03 | -     | 1.2E04                                | 7.1E04     | -      |
| - : below level of detection          |                                                |        |        |       |                                       |            |        |

1018  
 1019  
 1020  
 1021

1022

1023  
 1024  
 1025  
 1026  
 1027  
 1028  
 1029  
 1030  
 1031  
 1032  
 1033  
 1034  
 1035  
 1036  
 1037  
 1038

1039  
1040  
1041

**Table 4. ZIKV RNA (log) – Placental Tissues**

| <b>FRENCH POLYNESIAN (FP) ISOLATE</b> |               |               |               |               |               |               |
|---------------------------------------|---------------|---------------|---------------|---------------|---------------|---------------|
| <b>Dam</b>                            | <b>Site 1</b> | <b>Site 2</b> | <b>Site 3</b> | <b>Site 4</b> | <b>Site 5</b> | <b>Site 6</b> |
| <b>FP1</b>                            | -             | -             | -             | -             | -             | -             |
| <b>FP2</b>                            | -             | -             | -             | -             | -             | -             |
| <b>FP3</b>                            | -             | -             | -             | -             | -             | -             |
| <b>PUERTO RICAN (PR) ISOLATE</b>      |               |               |               |               |               |               |
| <b>PR1</b>                            | <b>2.0E05</b> | <b>1.7E05</b> | -             | <b>1.7E05</b> | <b>1.6E05</b> | <b>7.9E04</b> |
| <b>PR2</b>                            | -             | <b>7.5E04</b> | <b>3.6E05</b> | -             | <b>3.6E03</b> | <b>6.8E03</b> |
| <b>PR3</b>                            | -             | -             | -             | -             | -             | -             |

- : below level of detection

1042  
1043  
1044

1045

1046  
1047  
1048  
1049  
1050

1051

1052

1053

1054

1055

1056 **FIGURE 1**

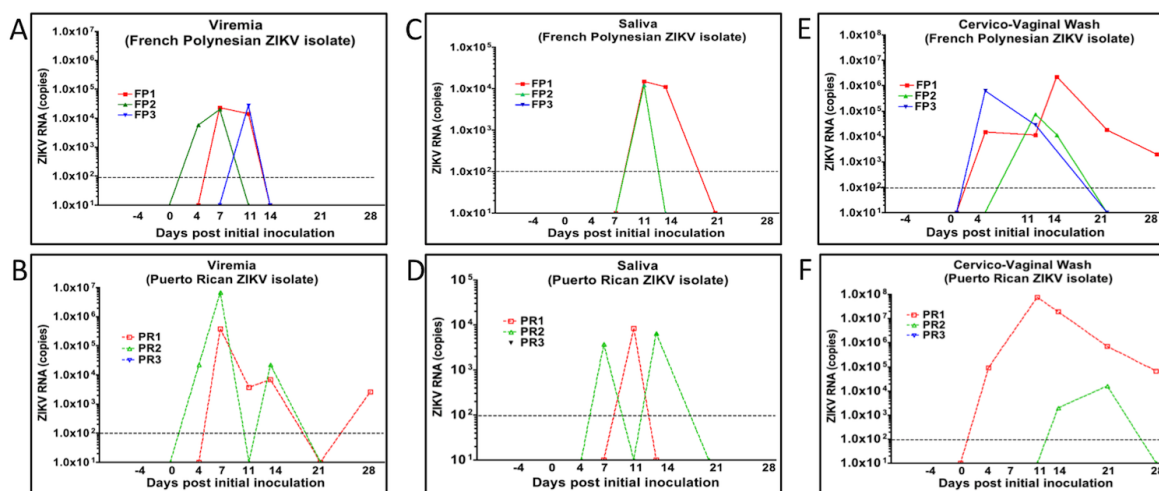

1057

1058

1059 **FIGURE 2**

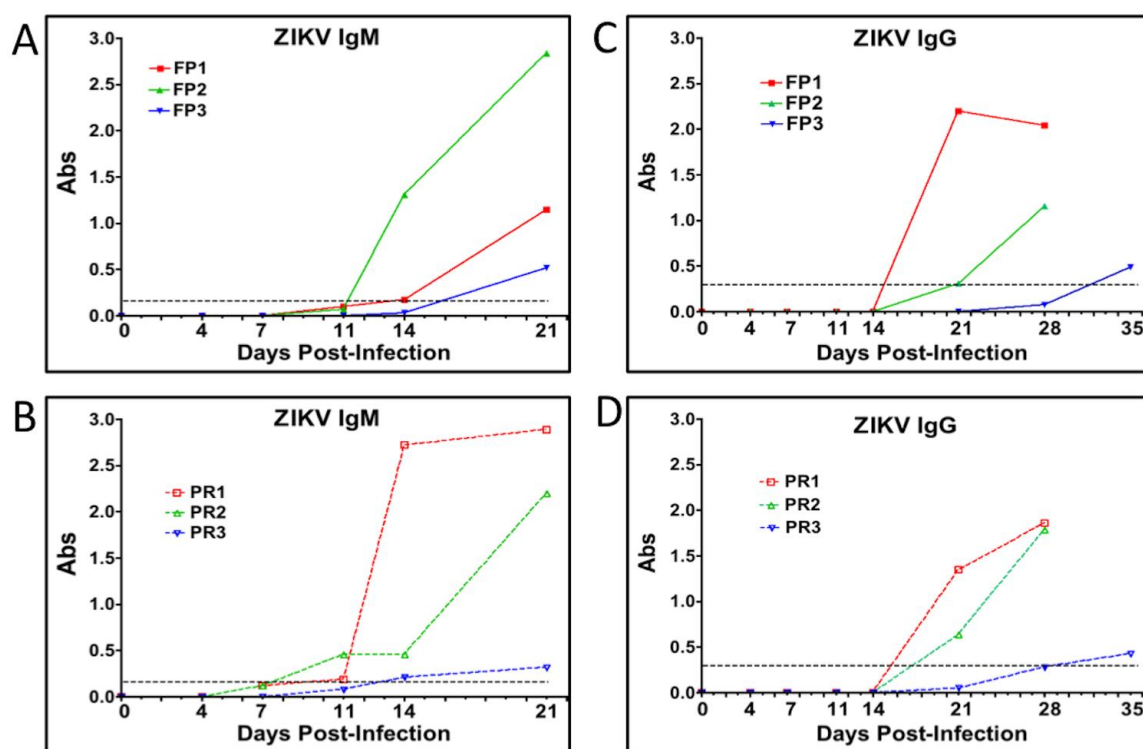

1060

1061

1062

1063 **FIGURE 3**

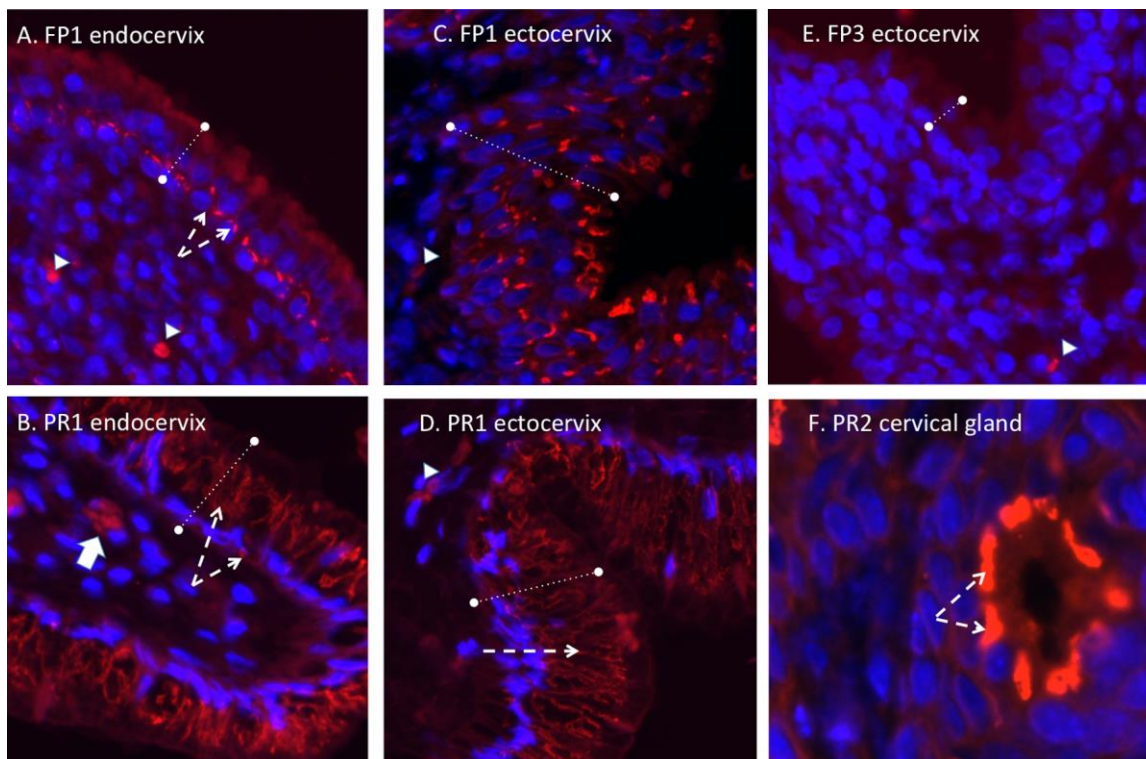

1064

1065



1066 **FIGURE 4**

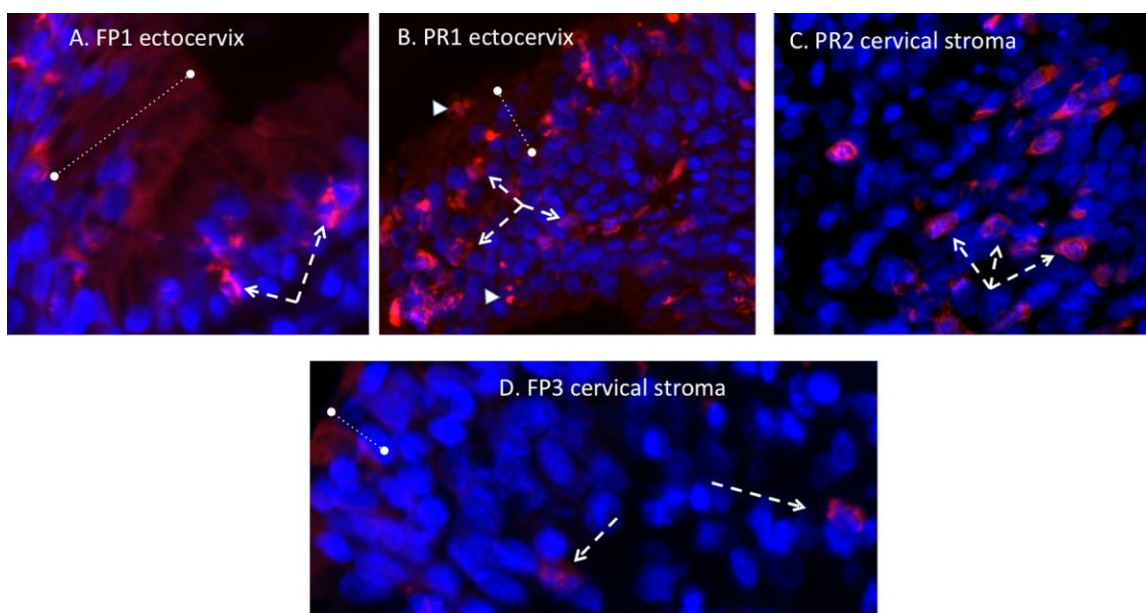

1067

1068

1069

1070 **FIGURE 5**

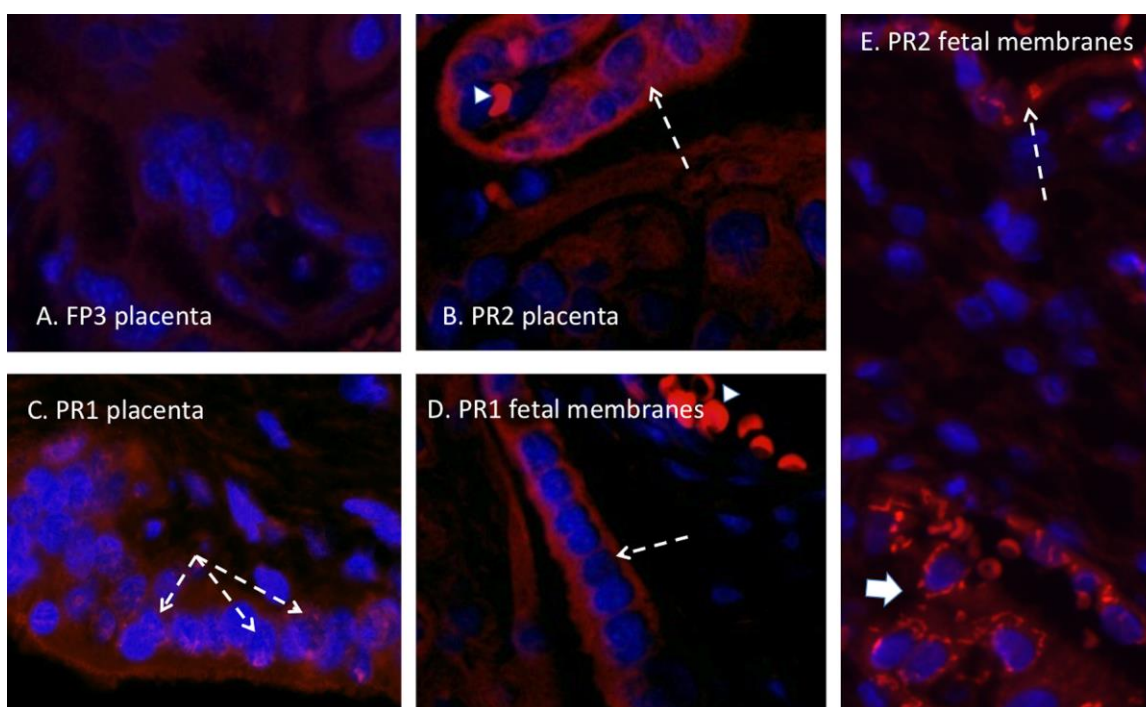

1071

1072

1073 **FIGURE 6**

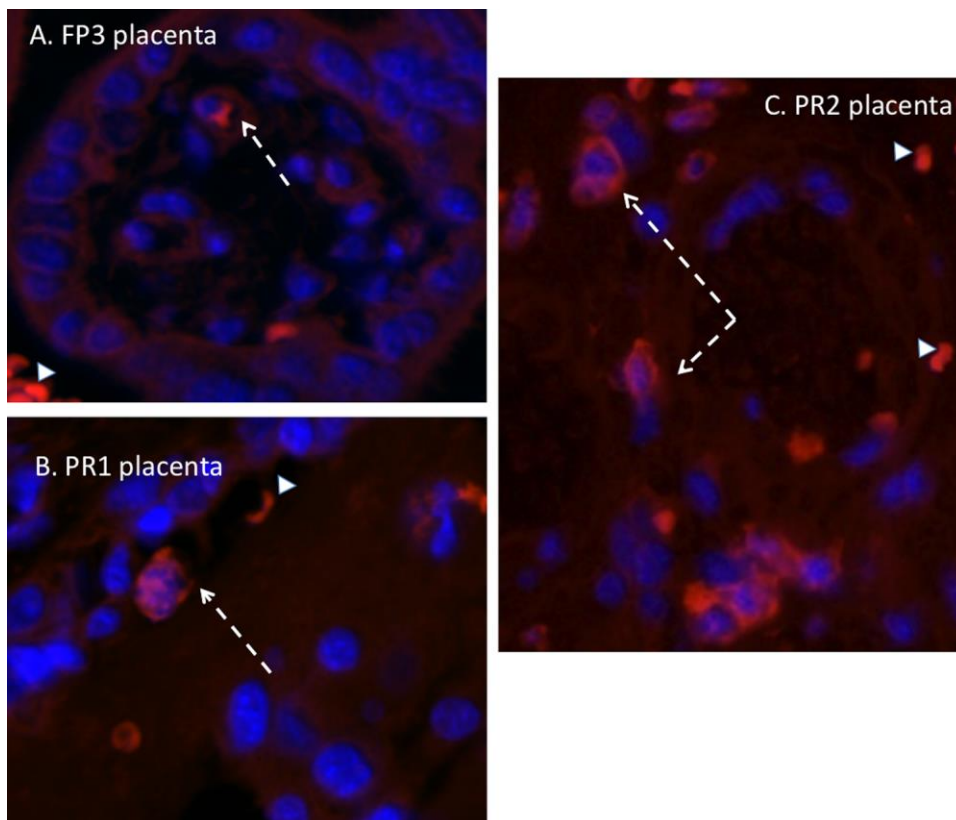

1074

1075

1076

1077

1078

1079

1080

1081

1082 **FIGURE 7**

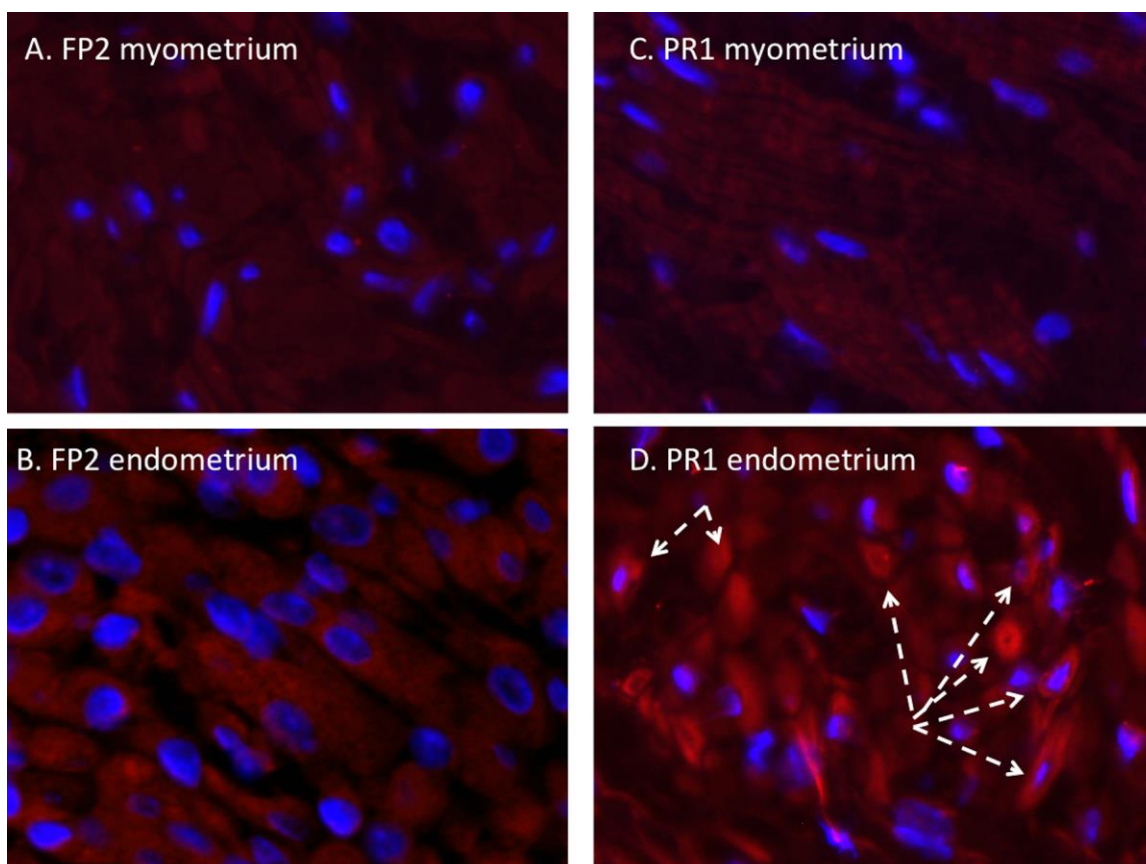

1083

1084

1085 **FIGURE 8**

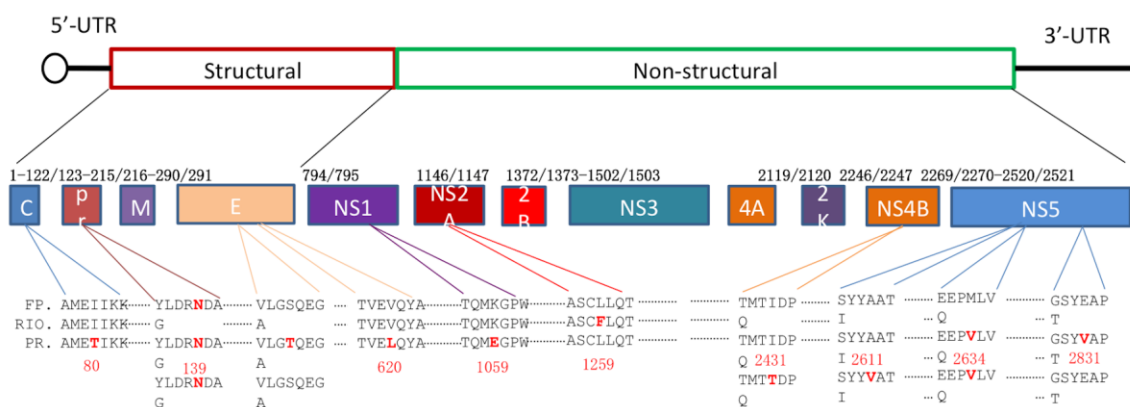

1086
